# Supplementary material for: Tuning epitaxial graphene sensitivity to water by hydrogen intercalation
Source: Royal Society of Chemistry journal article supplement (doi:10.1039/c6nr09465a), 2017-01-01
Supplement: c6nr09465a1.pdf [file c6nr09465a1.pdf]

## Supplementary information

### Tuning epitaxial graphene sensitivity to water by hydrogen intercalation

C. Melios<sup>1,2</sup>, M. Winters<sup>3</sup>, W. Strupiński<sup>4</sup>, V. Panchal<sup>1</sup>, C. E. Giusca<sup>1</sup>,

K.D.G.I. Jayawardena<sup>2</sup>, N. Rorsman<sup>3</sup>, S.R.P. Silva<sup>2</sup>, and O. Kazakova<sup>1\*</sup>

<sup>1</sup>National Physical Laboratory, Teddington, TW11 0LW, UK

<sup>2</sup>Advanced Technology Institute, University of Surrey, Guildford, GU2 7XH, UK

<sup>3</sup>Chalmers University of Technology, Dept. of Microtechnology and Nanoscience, Göteborg, 412-96, Sweden

<sup>4</sup>Institute of Electronic Materials Technology, Warsaw, 01-919, Poland

### The effect of atmospheric contaminants on the carrier concentration of epitaxial graphene on SiC(0001)

To investigate the effects of the atmospheric contaminants (*i.e.* N<sub>2</sub>, O<sub>2</sub>, NO<sub>2</sub>, and CO<sub>2</sub>) magneto-transport measurements were performed on an epitaxial graphene on SiC(0001) sample. The concentrations of CO<sub>2</sub> and NO<sub>2</sub> were chosen to simulate those naturally occurring in ambient air. The effect of O<sub>2</sub> was simulated using synthetic air (SA), which contains 21% O<sub>2</sub>, balanced with nitrogen. Prior to each measurement, the sample was annealed at 150°C in vacuum ( $P=1\times10^{-6}$  mbar) for two hours and then allowing time for the sample to cool down to room temperature. The measurements in figure S1 show a minor p-doping of 1LG due to O<sub>2</sub> in SA, however a significantly larger p-doping effect is observed due to CO<sub>2</sub> and NO<sub>2</sub> exposures, *i.e.* ~13% and ~23% decrease in  $(n-n_0)/n_0$ , respectively. In the case of 2LG, both NO<sub>2</sub> and CO<sub>2</sub> result in p-doping of graphene (with ~6% and <1% change in carrier concentration, respectively). These measurements demonstrate the thickness dependent atmospheric doping on epitaxial graphene.

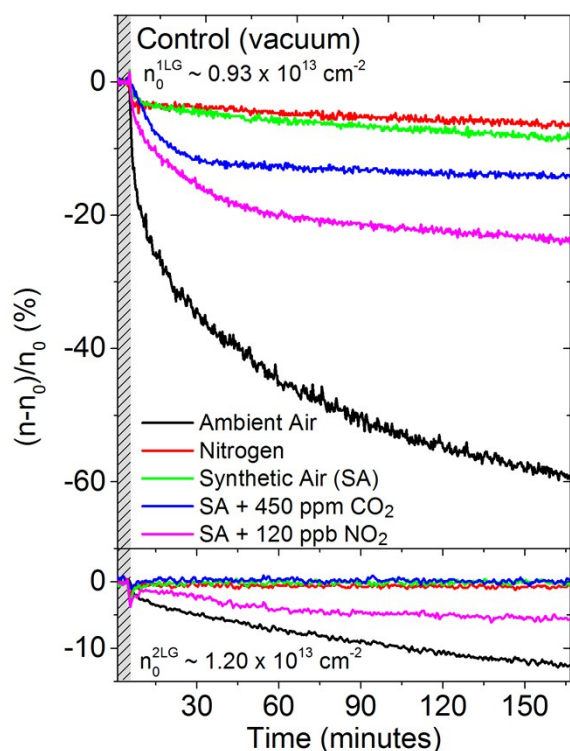

**Figure S1:** Carrier concentration of epitaxial graphene on SiC(0001) (top 1LG and bottom 2LG) under exposure to different atmospheric contaminants: (black) ambient, (red) nitrogen, (green) synthetic air (SA), (blue) SA + 450 ppm CO<sub>2</sub> and (pink) SA + 120 ppb NO<sub>2</sub>.
